# Supplementary material for: Near-Complete Genome of SARS-CoV-2 Delta (AY.3) Variant Identified in a Dog in Kansas, USA
Source: MDPI journal article supplement (doi:10.3390/v13102104), 2021-10-19
Supplement: s1 [file s1]

| <b>Virus Name</b>            | <b>GISAID #</b> |
|------------------------------|-----------------|
| hCoV-19/USA/KS-KSU-2046/2021 | EPI_ISL_3693315 |
| hCoV-19/USA/KS-KSU-1953/2021 | EPI_ISL_3231270 |
| hCoV-19/USA/KS-KSU-1982/2021 | EPI_ISL_3693311 |
| hCoV-19/USA/KS-KSU-2001/2021 | EPI_ISL_3693312 |
| hCoV-19/USA/KS-KSU-2015/2021 | EPI_ISL_3693313 |
| hCoV-19/USA/KS-KSU-2016/2021 | EPI_ISL_3693314 |
| hCoV-19/USA/KS-KSU-2047/2021 | EPI_ISL_3693316 |
| hCoV-19/USA/KS-KSU-2048/2021 | EPI_ISL_3693317 |
| hCoV-19/USA/KS-KSU-2067/2021 | EPI_ISL_3693318 |
| hCoV-19/USA/KS-KSU-2068/2021 | EPI_ISL_3693319 |
| hCoV-19/USA/KS-KSU-2136/2021 | EPI_ISL_3693320 |
| hCoV-19/USA/KS-KSU-2146/2021 | EPI_ISL_3693321 |
| hCoV-19/USA/KS-KSU-2180/2021 | EPI_ISL_3941711 |
| hCoV-19/USA/KS-KSU-2267/2021 | EPI_ISL_3941712 |
| hCoV-19/USA/KS-KSU-2305/2021 | EPI_ISL_3941713 |
| hCoV-19/USA/KS-KSU-2302/2021 | EPI_ISL_3941714 |
| hCoV-19/USA/KS-KSU-2325/2021 | EPI_ISL_3941715 |
| hCoV-19/USA/KS-KSU-2402/2021 | EPI_ISL_3941716 |
| hCoV-19/USA/KS-KSU-2509/2021 | EPI_ISL_3941717 |
| hCoV-19/USA/KS-KSU-2510/2021 | EPI_ISL_3941718 |
| hCoV-19/USA/KS-KSU-2511/2021 | EPI_ISL_3941719 |
| hCoV-19/USA/KS-KSU-2512/2021 | EPI_ISL_3941720 |
| hCoV-19/USA/KS-KSU-2601/2021 | EPI_ISL_3941721 |
| hCoV-19/USA/KS-KSU-2671/2021 | EPI_ISL_3941722 |
| hCoV-19/USA/KS-KSU-2672/2021 | EPI_ISL_3941723 |
| hCoV-19/USA/KS-KSU-2731/2021 | EPI_ISL_3941724 |
| hCoV-19/USA/KS-KSU-2812/2021 | EPI_ISL_3941725 |
| hCoV-19/USA/KS-KSU-2882/2021 | EPI_ISL_3941726 |
| hCoV-19/USA/KS-KSU-2938/2021 | EPI_ISL_3941727 |
| hCoV-19/USA/KS-KSU-2183/2021 | EPI_ISL_3941728 |

Supplemental Table 1. SARS-CoV-2 sequences utilized in this study.

| <b>Coding region</b> | <b>Nucleotide site</b> | <b>Nucleotide change</b> | <b>Amino acid change</b> |
|----------------------|------------------------|--------------------------|--------------------------|
| <b>5'UTR</b>         | 210                    | G>T                      | -                        |
|                      | 241                    | C>T                      | -                        |
| <b>ORF 1ab</b>       | 3037                   | C>T                      | -                        |
|                      | 4181                   | G>T                      | A>S                      |
|                      | 6402                   | C>T                      | P>L                      |
|                      | 7124                   | C>T                      | P>S                      |
|                      | 8986                   | C>T                      | -                        |
|                      | 9053                   | G>T                      | V>L                      |
|                      | 10029                  | C>T                      | T>I                      |
|                      | 11201                  | A>G                      | T>A                      |
|                      | 11333                  | A>G                      | -                        |
|                      | 14408                  | C>T                      | P>L                      |
|                      | 15451                  | C>A                      | G>S                      |
|                      | 16467                  | C>T                      | P>L                      |
|                      | 19220                  | C>T                      | A>V                      |
| <b>S</b>             | 21618                  | C>G                      | T>R                      |
|                      | 22911                  | T>G                      | L>R                      |
|                      | 22989                  | C>A                      | T>K                      |
|                      | 23397                  | A>G                      | D>G                      |
|                      | 23598                  | C>G                      | P>R                      |
|                      | 24404                  | G>A                      | D>N                      |
| <b>3a</b>            | 25497                  | C>T                      | S>L                      |
| <b>E</b>             | 26761                  | T>C                      | I>T                      |
| <b>7ab</b>           | 27632                  | T>C                      | V>A                      |
|                      | 27746                  | C>T                      | T>I                      |
| <b>8</b>             | 27868                  | C>T                      | T>I                      |
| <b>N</b>             | 28448                  | A>G                      | D>G R>M                  |
|                      | 28868                  | G>T                      |                          |
|                      | 28903                  | G>T                      | G>L                      |
|                      | 29389                  | G>T                      | D>Y                      |
| <b>3'UTR</b>         | 29729                  | G>T                      | -                        |

Supplemental Table 2. SARS-CoV-2 Kansas genomic changes. Nucleotide and amino acid changes are indicated.
